# Supplementary material
Source: PubMed Central journal article supplement (PMC2241734)
Supplement: NIHMS39096-supplement-supplement.pdf [file NIHMS39096-supplement-supplement.pdf]

## SUPPLEMENTAL DATA

**Table S1. The identity and characteristics of the genes pulled down by Dnmt3b antibody.**

| Accession #                              | Description                                                         |
|------------------------------------------|---------------------------------------------------------------------|
| <b>Cell matrix/transmembrane protein</b> |                                                                     |
| BC054061                                 | Polypeptide N-acetylgalactosaminyltransferase                       |
| AK005100                                 | Leucyl/cystinyl aminopeptidase                                      |
| AF488804                                 | ADAMTS20                                                            |
| NM_017296                                | Kcnj2, Potassium inwardly-rectifying channel, subfamily J, member 2 |
| <b>Brain /Neuron specific</b>            |                                                                     |
| BC056366                                 | Nadrin; neuron-specific GTPase activating protein                   |
| BC052470                                 | Limb-bud and heart                                                  |
| XM_343205                                | Synaptotagmin I, may have a regulatory role                         |
| U39549                                   | Synaptogyrin                                                        |
| AF465439                                 | Beta I spectrin form betal sigma3                                   |
| AK046673                                 | Neutrophil cytosolic factor 2; NADPH oxidase subunit                |
| AF494095                                 | T-cadherin (Cadherin 13)                                            |
| AB073718                                 | Neural specific DNA binding protein GLI3                            |
| <b>Signal- transduction</b>              |                                                                     |
| AK030036                                 | Serine/threonine-protein kinase ULK1                                |
| NM_022958                                | Phosphatidylinositol 3-kinase                                       |
| AF042026                                 | Olfactory receptor MOR101-2                                         |
| NM_053917                                | Inositol polyphosphate-4-phosphatase, type II                       |
| NM_021587                                | Latent TGF-beta binding protein 1                                   |
| <b>Cell cycle progression</b>            |                                                                     |
| XM_573350                                | Similar to Cell division protein kinase 8 (Protein kinase K35)      |
| AB027128                                 | POLH Polymerase (DNA directed)                                      |
| <b>Transcriptional regulation</b>        |                                                                     |
| AK031075                                 | Paired mesoderm homeobox protein 1                                  |
| AK076283                                 | RNA polymerase B transcription factor 3                             |
| XM_225238                                | Transcription factor AP-2                                           |
| AF176695                                 | Subunit of RNA polymerase III transcription initiation factor IIIB  |
| AF106698                                 | PPAR gamma coactivator-1                                            |
| AK025663                                 | Zinc finger protein 291                                             |
| NM_133422                                | Zinc finger protein 483                                             |

Formaldehyde cross-linked chromatin isolated from NGF-treated cells was first pre-cleared with pre-immune serum and protein A beads followed by immunoprecipitation with affinity purified Dnmt3b antibody. After immunoprecipitation, DNA was de-crosslinked and purified by proteinase K digestion, phenol extraction, and ethanol precipitation. The purified DNA was subjected to end filling/repairing with Klenow and subsequently cloned into the Sma I site of pBlueScript-SK+ to allow blue white color selection. Individual clones were identified by automated sequencing and database analysis.
